## CORRECTION

# Correction: The reluctant visitor: an alkaloid in toxic nectar can reduce olfactory learning and memory in Asian honey bees (doi:10.1242/jeb.168344)

**Junjun Zhang, Zhengwei Wang, Ping Wen, Yufeng Qu, Ken Tan and James C. Nieh**

There was an error published in *J. Exp. Biol.* (2018) **221**, jeb168344 (doi:10.1242/jeb.168344).

The terpenoid triptolide was mistakenly referred to as an alkaloid in the title and text. The title has been changed to ‘The reluctant visitor: a terpenoid in toxic nectar can reduce olfactory learning and memory in Asian honey bees’ and text in the final paragraph of the Introduction and the first paragraph of the Discussion has been corrected in the online full-text and PDF versions.

The authors apologise for any inconvenience this may have caused.
